# Supplementary material
Source: PubMed Central journal article supplement (PMC6280790)

# Source Data Figure 1

**B**

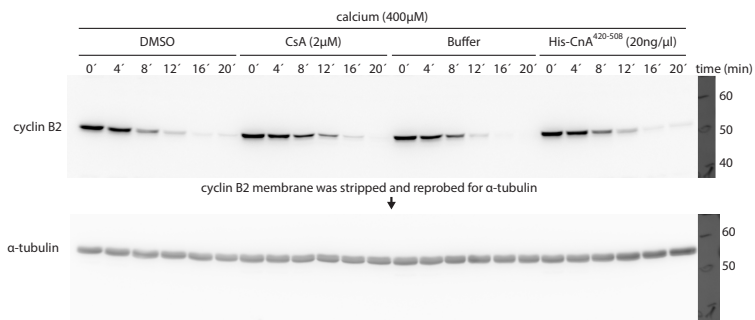

**C**

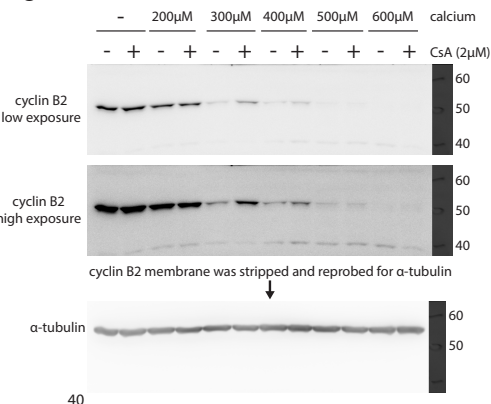

**D**

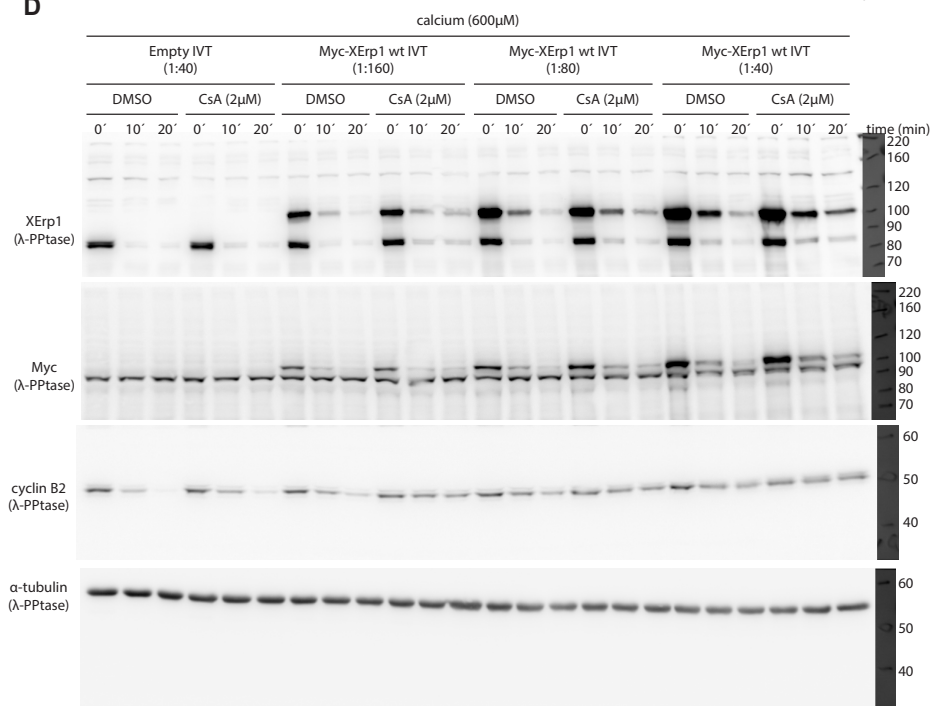

**E**

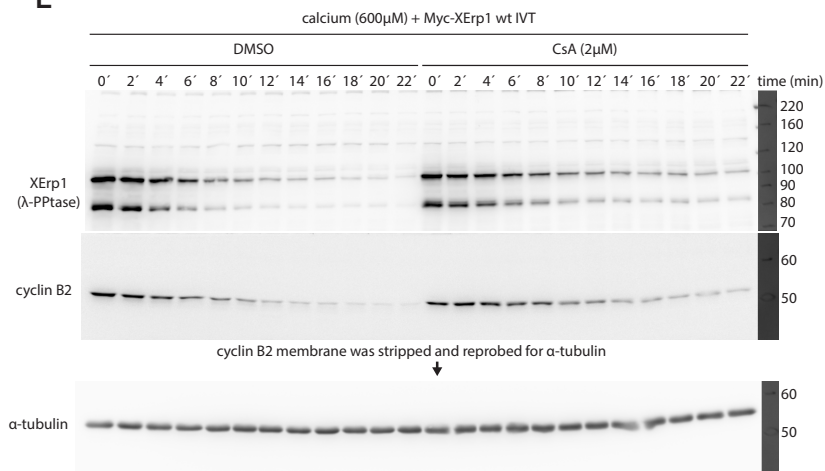

Supplement: EMBR-19-e46433-s002.pdf [file EMBR-19-e46433-s002.pdf]

## Source Data Figure 2

**B**

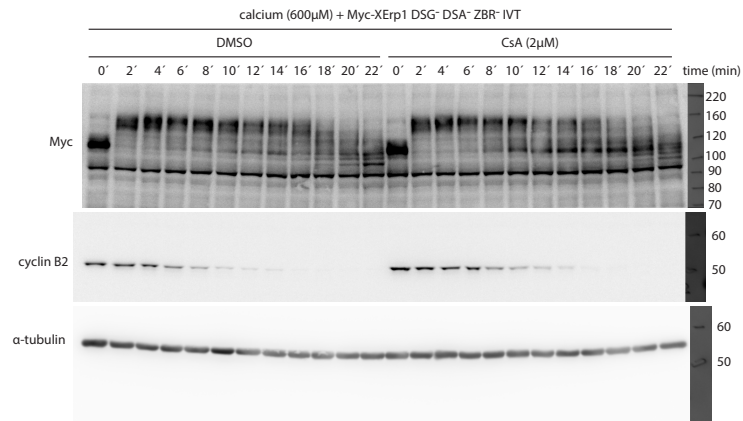

**C**

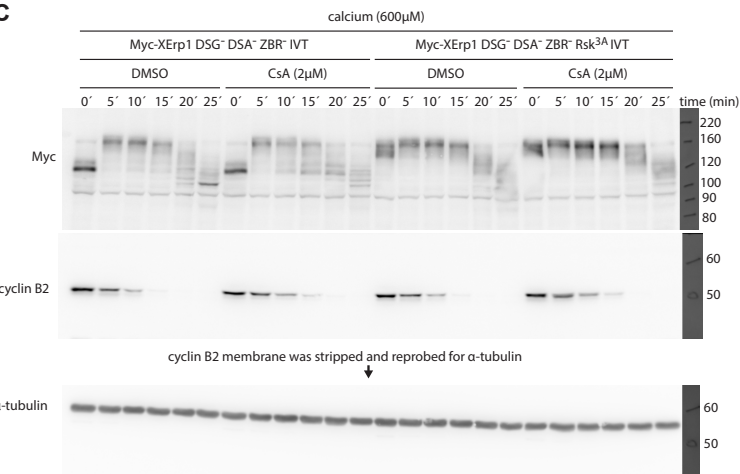

**D**

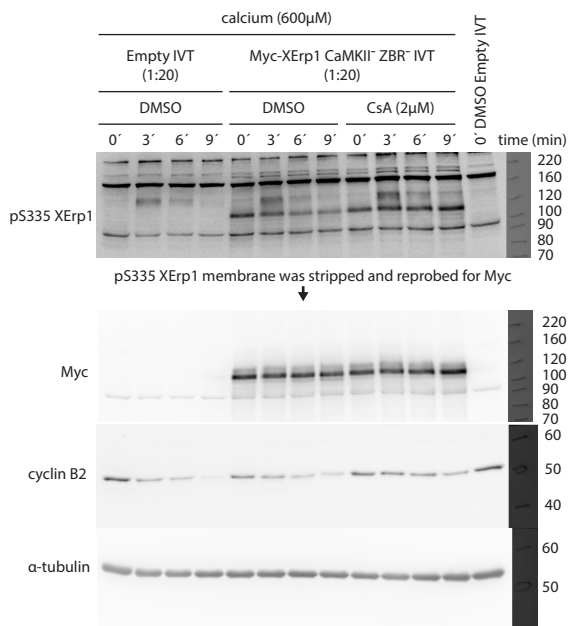

**E**

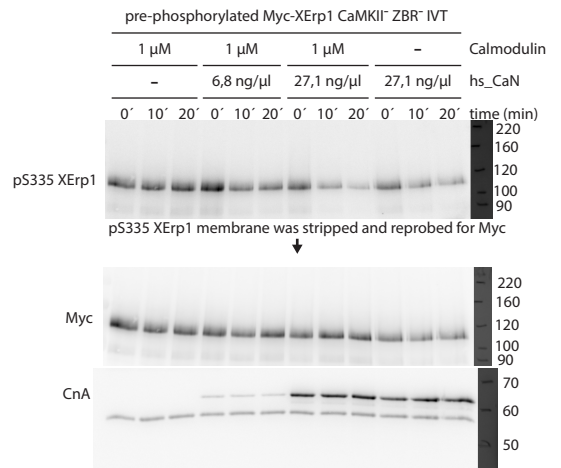

Supplement: EMBR-19-e46433-s003.pdf [file EMBR-19-e46433-s003.pdf]

# Figure 3 Source Data

**A**

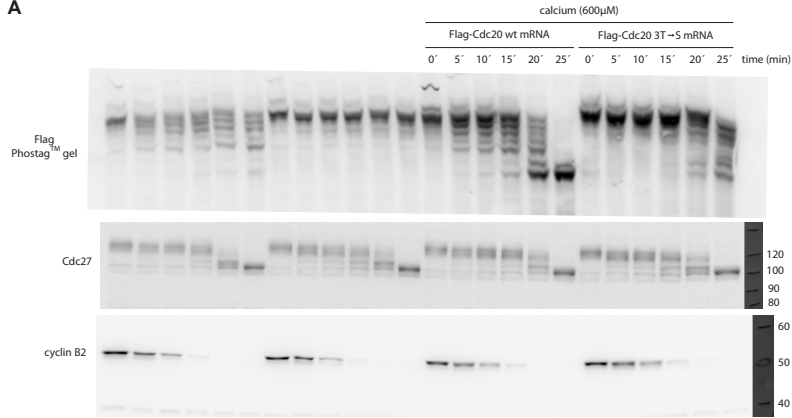

**B**

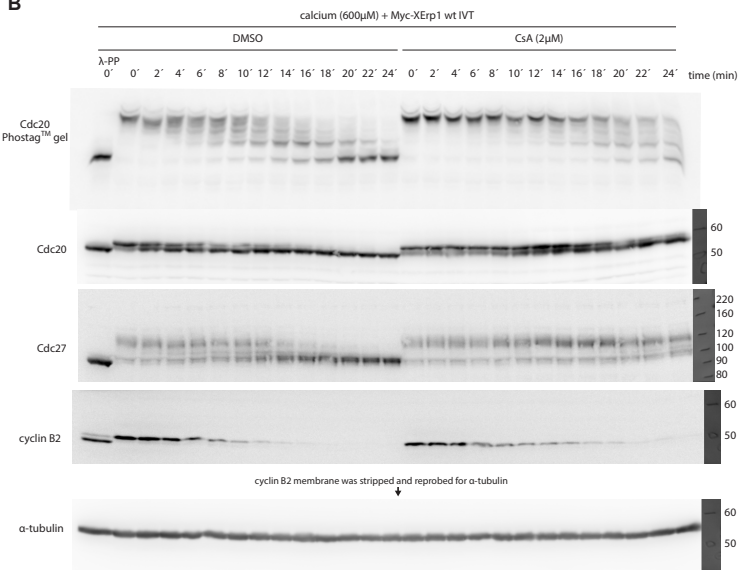

**C**

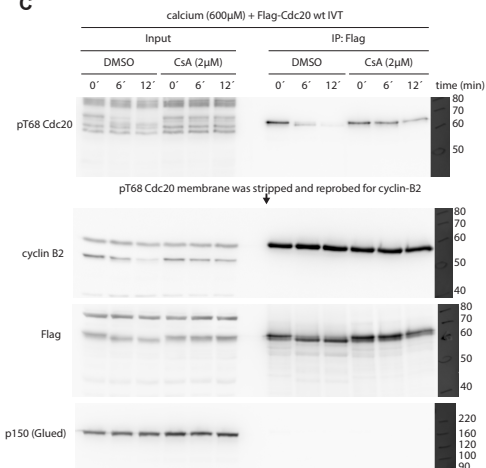

**D**

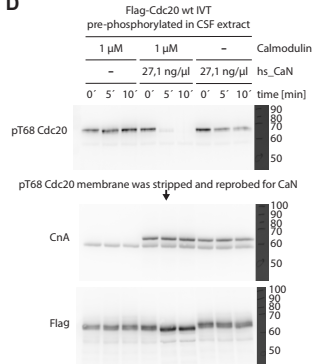

Supplement: EMBR-19-e46433-s004.pdf [file EMBR-19-e46433-s004.pdf]
